# Supplementary material for: Catheter ablation or surgical therapy in moderate-severe tricuspid regurgitation caused by long-standing persistent atrial fibrillation. Propensity score analysis
Source: Springer Nature journal article supplement (doi:10.1186/s13019-020-01336-3), 2020-09-29

## SUPPLEMENTAL MATERIAL

**Supplementary Table 1. Echocardiographic characteristics of catheter cohort at baseline and follow-up**

|                      | Rhythm at Follow-up<br>(SR n = 175)<br>(Recurrent AF n = 104) | Baseline  | P value<br>(Recurrent AF vs.<br>SR at Baseline) | Follow-up | P value<br>(Baseline vs.<br>Follow-up) | P value<br>(Recurrent AF vs.<br>SR at Follow-up) |
|----------------------|---------------------------------------------------------------|-----------|-------------------------------------------------|-----------|----------------------------------------|--------------------------------------------------|
| LVESD, mm            | Sinus                                                         | 34.6±12.4 | 0.302                                           | 34.8±9.2  | 0.802                                  | 0.620                                            |
|                      | Recurrent AF                                                  | 37.4±11.9 |                                                 | 37.9±5.0  |                                        |                                                  |
| LVEDD, mm            | Sinus                                                         | 53.9±7.8  | 0.217                                           | 52.6±7.7  | 0.217                                  | 0.129                                            |
|                      | Recurrent AF                                                  | 51.8±6.1  |                                                 | 52.7±7.3  |                                        |                                                  |
| sPAP, mmHg           | Sinus                                                         | 38.4±6.3  | 0.292                                           | 37.3±8.2  | 0.370                                  | 0.151                                            |
|                      | Recurrent AF                                                  | 39.9±5.2  |                                                 | 39.6±6.6  |                                        |                                                  |
| LAD, mm              | Sinus                                                         | 53.1±10.6 | 0.093                                           | 53.8±9.7  | 0.510                                  | 0.159                                            |
|                      | Recurrent AF                                                  | 52.8±12.1 |                                                 | 54.5±11.2 |                                        |                                                  |
| LVEF, %              | Sinus                                                         | 62.1±5.9  | 0.721                                           | 60.4±10.1 | 0.443                                  | 0.999                                            |
|                      | Recurrent AF                                                  | 59.8±7.3  |                                                 | 59.4±6.8  |                                        |                                                  |
| RAA, mm <sup>2</sup> | Sinus                                                         | 20.1±4.7  | 0.093                                           | 18.3±6.9  | 0.076                                  | 0.040                                            |
|                      | Recurrent AF                                                  | 19.8±5.2  |                                                 | 21.3±6.9  |                                        |                                                  |
| RVSI                 | Sinus                                                         | 2.0±0.6   | 0.039                                           | 2.1±0.2   | 0.014                                  | <0.001                                           |
|                      | Recurrent AF                                                  | 1.9±0.1   |                                                 | 1.8±0.5   |                                        |                                                  |

|                                 |              |          |       |          |       |        |
|---------------------------------|--------------|----------|-------|----------|-------|--------|
| RVFAC, %                        | Sinus        | 44.6±3.9 | 0.091 | 45.2±8.9 | 0.048 | 0.031  |
|                                 | Recurrent AF | 42.9±6.3 |       | 40.6±7.2 | 0.042 |        |
| Tethering height, mm            | Sinus        | 4.5±1.5  | 0.004 | 3.1±3.6  | 0.013 | <0.001 |
|                                 | Recurrent AF | 7.6±1.9  |       | 8.6±1.9  | 0.069 |        |
| Tethering area, cm <sup>2</sup> | Sinus        | 1.8±0.7  | 0.034 | 1.1±0.4  | 0.020 | <0.001 |
|                                 | Recurrent AF | 2.0±0.9  |       | 2.6±0.7  | 0.072 |        |
| TAD, cm                         | Sinus        | 35.2±3.5 | 0.077 | 33.0±6.7 | 0.016 | 0.008  |
|                                 | Recurrent AF | 36.9±3.7 |       | 39.2±6.2 | 0.006 |        |
| TR EROA, cm <sup>2</sup>        | Sinus        | 0.7±0.6  | 0.096 | 0.4±0.5  | 0.028 | 0.015  |
|                                 | Recurrent AF | 0.8±0.7  |       | 1.0±0.6  | 0.021 |        |
| TR VC, cm                       | Sinus        | 0.9±0.8  | 0.087 | 0.4±0.3  | 0.012 | 0.008  |
|                                 | Recurrent AF | 1.0±0.3  |       | 1.1±0.5  | 0.057 |        |
| TR Grade                        | Sinus        | 3.2±0.3  | 0.051 | 2.4±0.8  | 0.013 | <0.001 |
|                                 | Recurrent AF | 3.6±0.4  |       | 3.9±0.2  | 0.048 |        |

AF = atrial fibrillation; EROA = effective regurgitant orifice area; LAD = left atrial diameter; LVEF = left ventricle ejection fraction; LVEDD = left ventricle end-diastolic dimension LVESD = left ventricle end-systolic dimension; RAA = right atrial

area; RVFAC = right ventricle fractional area change; RVSI = right ventricle sphericity index; sPAP = pulmonary artery systolic pressure; TAD = tricuspid annulus diameter; TR = tricuspid regurgitation; VC = vena contracta.

**Supplementary Table 2. Echocardiographic characteristics of surgical cohort at baseline and follow-up**

|                      | Rhythm at Follow-up<br>(SR n =66)<br>(Recurrent AF n = 48) | Baseline  | P value<br>(Recurrent AF vs.<br>SR at Baseline) | Follow-up | P value<br>(Baseline vs.<br>Follow-up) | P value<br>(Recurrent AF vs.<br>SR at Follow-up) |
|----------------------|------------------------------------------------------------|-----------|-------------------------------------------------|-----------|----------------------------------------|--------------------------------------------------|
| LVEDS, mm            | Sinus                                                      | 38.1±10.7 | 0.459                                           | 36.8±10.4 | 0.819                                  | 0.115                                            |
|                      | Recurrent AF                                               | 37.0±13.1 |                                                 | 37.9±.6   |                                        |                                                  |
| LVEDD, mm            | Sinus                                                      | 54.2±4.9  | 0.348                                           | 53.8±10.1 | 0.812                                  | 0.258                                            |
|                      | Recurrent AF                                               | 52.9±8.1  |                                                 | 53.1±6.9  |                                        |                                                  |
| sPAP, mmHg           | Sinus                                                      | 40.5±5.9  | 0.326                                           | 39.8±9.3  | 0.744                                  | 0.721                                            |
|                      | Recurrent AF                                               | 41.0±7.1  |                                                 | 40.6±7.2  |                                        |                                                  |
| LAD, mm              | Sinus                                                      | 54.1±9.6  | 0.096                                           | 53.8±10.5 | 0.184                                  | 0.629                                            |
|                      | Recurrent AF                                               | 53.9±4.3  |                                                 | 54.6±9.5  |                                        |                                                  |
| LVEF, %              | Sinus                                                      | 57.9±6.4  | 0.953                                           | 59.7±9.6  | 0.118                                  | 0.154                                            |
|                      | Recurrent AF                                               | 59.2±5.8  |                                                 | 60.4±10.0 |                                        |                                                  |
| RAA, mm <sup>2</sup> | Sinus                                                      | 21.6±2.7  | 0.093                                           | 20.5±7.4  | 0.064                                  | 0.046                                            |
|                      | Recurrent AF                                               | 20.1±3.6  |                                                 | 22.7±8.1  |                                        |                                                  |
| RVSI                 | Sinus                                                      | 2.0±0.7   | 0.020                                           | 2.1±0.9   | 0.012                                  | <0.001                                           |
|                      | Recurrent AF                                               | 1.9±0.2   |                                                 | 1.8±0.7   |                                        |                                                  |
| RVFAC, %             | Sinus                                                      | 41.3±8.3  | 0.087                                           | 43.9±7.3  | 0.028                                  | 0.013                                            |

|                                 |              |          |       |          |        |        |
|---------------------------------|--------------|----------|-------|----------|--------|--------|
|                                 | Recurrent AF | 42.9±6.8 |       | 40.7±9.0 | 0.024  |        |
| Tethering height, mm            | Sinus        | 8.2±3.6  | 0.007 | 4.9±3.7  | <0.001 | <0.001 |
|                                 | Recurrent AF | 14.3±4.8 |       | 13.9±4.1 | 0.920  |        |
| Tethering area, cm <sup>2</sup> | Sinus        | 3.9±0.3  | 0.041 | 1.4±0.9  | 0.006  | <0.001 |
|                                 | Recurrent AF | 4.3±0.3  |       | 4.6±1.0  | 0.485  |        |
| TAD, cm                         | Sinus        | 38.8±6.7 | 0.059 | 34.7±5.9 | 0.001  | <0.001 |
|                                 | Recurrent AF | 40.1±4.0 |       | 43.8±5.7 | 0.008  |        |
| TR EROA, cm <sup>2</sup>        | Sinus        | 0.9±0.2  | 0.098 | 0.5±0.7  | 0.003  | 0.023  |
|                                 | Recurrent AF | 1.0±0.6  |       | 1.1±0.4  | 0.089  |        |
| TR VC, cm                       | Sinus        | 0.9±0.4  | 0.084 | 0.5±0.6  | 0.009  | 0.002  |
|                                 | Recurrent AF | 1.0±0.3  |       | 1.1±0.9  | 0.819  |        |
| TR Grade                        | Sinus        | 3.4±0.7  | 0.089 | 2.7±0.6  | 0.012  | <0.001 |
|                                 | Recurrent AF | 3.6±0.6  |       | 3.8±0.7  | 0.812  |        |

AF = atrial fibrillation; EROA = effective regurgitant orifice area; LAD = left atrial diameter; LVEF = left ventricle ejection fraction; LVEDD = left ventricle end-diastolic dimension LVESD = left ventricle end-systolic dimension; RAA = right atrial area; RVFAC = right ventricle fractional area change; RVSI = right ventricle sphericity index; sPAP = pulmonary artery systolic pressure; TAD = tricuspid annulus diameter; TR = tricuspid regurgitation; VC = vena contracta.

**S Figure 1.** Propensity-score matching for the total cohort. A, Dot plot of patients in either matched or unmatched groups. B, Histograms with overlaid kernel density estimates of standardized differences before and after matching. C, Distribution of propensity scores of surgical (“treated”) and catheter cohort (“control”) before and after matching with overlaid kernel density estimate. D, Line plot of standardized differences before and after matching. E, Dot plot of standardized mean differences (Cohen’s d) for all covariates before and after matching.

ACEI indicates angiotensin-converting enzyme inhibitor; ACT, aortic clamp time; ARB, angiotensin receptor blocker; BMI, body mass index; CAD, coronary artery disease; COPD, chronic obstructive pulmonary disease; EROA, effective regurgitant orifice area; LAD, left atrial diameter; LVEDD, left ventricle end- diastolic dimension; LVEF, left ventricle ejection fraction; LVESD, left ventricle end-systolic dimension; NYHA, New York Heart Association; RA, right atrial; RVFAC, right ventricle fractional area change; RVSI, right ventricle sphericity index; sPAP, pulmonary artery systolic pressure; TAD, tricuspid annulus diameter; TR, tricuspid regurgitation; VC, vena contracta.

**S Figure 2.** Example of a patient in surgical cohort with a preoperational tethering height of 1.22cm (A), had a significant moderate-severe TR at 18 months follow-up with recurrent AF (B).

**S Figure 3.** Example of a patient with a preoperational moderate-severe TR and tethering height of 0.4 cm in catheter cohort (A), had no TR at 24 months follow-up with sinus rhythm (B).

**S Figure 4.** Example of using an autologous pericardial patch (white arrow) to enlarge the anterior tricuspid leaflet in patients with tethering height more than 8mm.

S Figure 1.

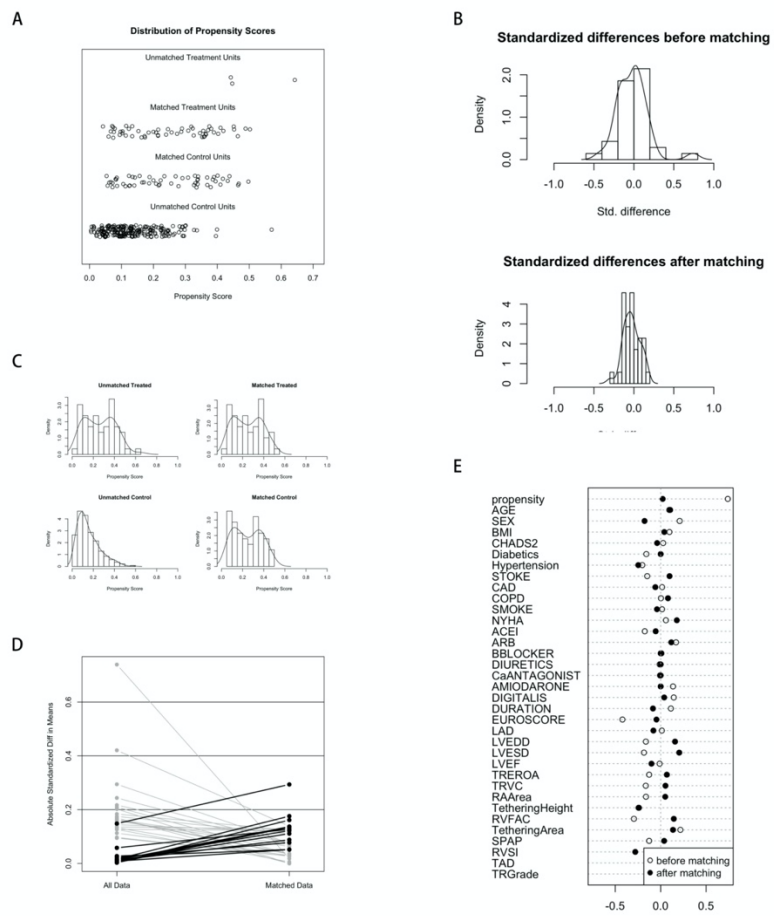



S figure 2.

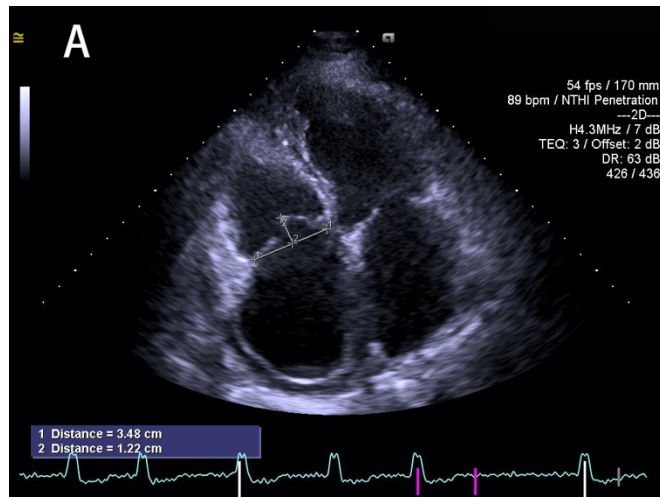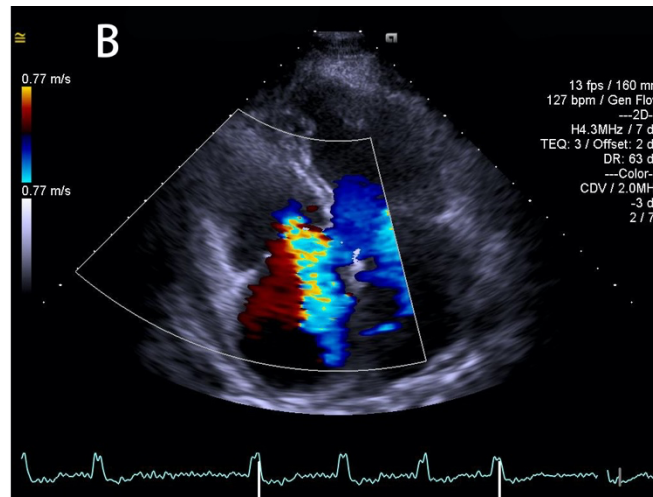

S Figure 3.

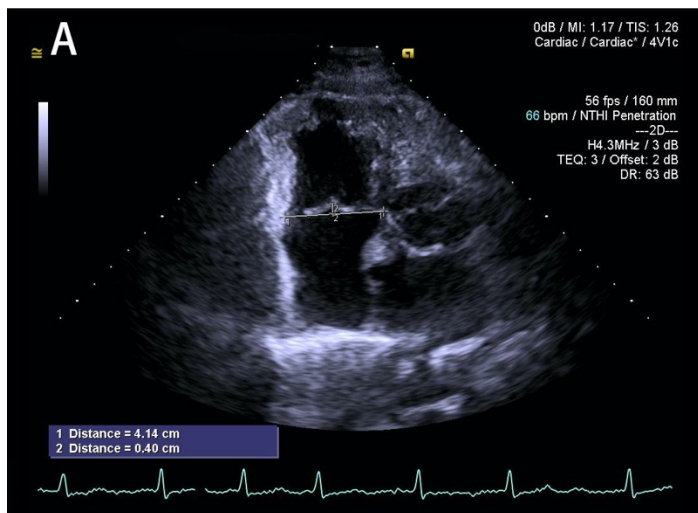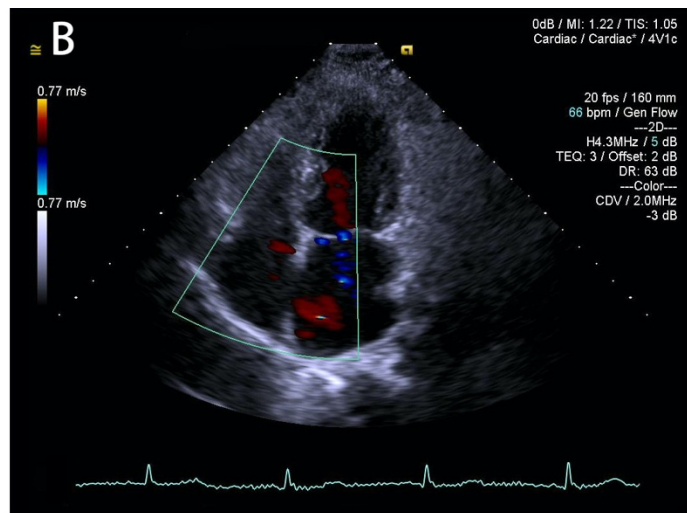

S Figure 4.

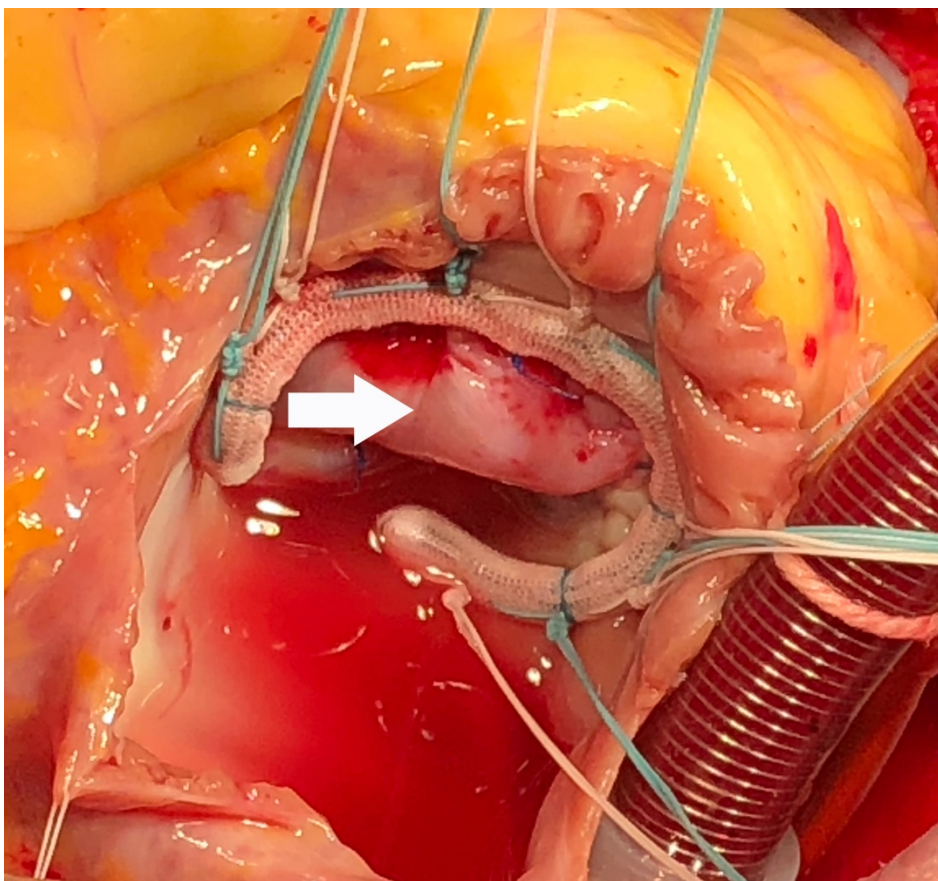

Supplement: MOESM1 [file 18429806]
